# Supplementary material for: Potent and PPARα-independent anti-proliferative action of the hypolipidemic drug fenofibrate in VEGF-dependent angiosarcomas in vitro
Source: PubMed Central journal article supplement (PMC6474884; doi:10.1038/s41598-019-42838-y), 2019-04-19
Supplement: 41598_2019_42838_MOESM1_ESM.pdf [file 41598_2019_42838_MOESM1_ESM.pdf]

SUPPLEMENTARY INFORMATION

**Potent and PPAR $\alpha$ -independent anti-proliferative action of the hypolipidemic drug fenofibrate in VEGF-dependent angiosarcomas *in vitro***

Yasser Majeed<sup>1,\*</sup>, Rohit Upadhyay<sup>1</sup>, Sara Alhousseiny<sup>1,2</sup>, Tarek Taha<sup>1,2</sup>, Adham Musthak<sup>1,2</sup>, Yanal Shaheen<sup>1,2</sup>, Mohtashim Jameel<sup>1</sup>, Chris R Triggie<sup>1,2</sup>, Hong Ding<sup>1,2\*</sup>

<sup>1</sup>Department of Pharmacology and <sup>2</sup>Department of Medical Education, Weill Cornell Medicine-Qatar, Education City, Doha, Qatar, PO Box 24144.

**\* Authors for correspondence:**

Dr Yasser Majeed, Postdoctoral Associate in Pharmacology, Department of Pharmacology, Weill Cornell Medicine-Qatar, Doha, Qatar, PO Box 24144. Telephone: (+974)-44928934. E-mail: [yam2013@qatar-med.cornell.edu](mailto:yam2013@qatar-med.cornell.edu)

(or)

Dr Hong Ding, Associate Professor of Research in Pharmacology, Department of Pharmacology, Weill Cornell Medicine-Qatar, Doha, Qatar, PO Box 24144. Telephone: (+974)-44928362. E-mail: [hod2005@qatar-med.cornell.edu](mailto:hod2005@qatar-med.cornell.edu)

**Supplementary Table: Microarray to detect fenofibrate-induced changes in cancer-relevant miRNAs.** The table includes the list of 84 miRNAs and their assignment within the 96-well microarray plate. Target expression ( $C_T$ ) values in Control (0.1% DMSO)- and fenofibrate-treated cells are indicated, in addition to the calculated fold change. SNORD96A was used as the endogenous control for data normalization.

| WELL | Mature ID       | Ctrl         | fenofibrate  | Fold change |
|------|-----------------|--------------|--------------|-------------|
| A01  | mmu-let-7a-5p   | 24.93588257  | 24.91277122  | 1.02        |
| A02  | mmu-miR-133b-3p | 35.93977356  | 35.93517303  | 1           |
| A03  | mmu-miR-122-5p  | 34.91236877  | 33.91579437  | 2           |
| A04  | mmu-miR-20b-5p  | 27.92950058  | 26.91789055  | 2.02        |
| A05  | mmu-miR-335-5p  | 26.92457199  | 27.91700554  | -1.98       |
| A06  | mmu-miR-196a-5p | 30.93502235  | 31.92500496  | -1.98       |
| A07  | mmu-miR-125a-5p | 22.92657089  | 22.9295845   | 1           |
| A8   | mmu-miR-142a-5p | Undetermined | Undetermined | 1           |
| A09  | mmu-miR-96-5p   | 33.92160797  | 33.91548538  | 1.01        |
| A10  | mmu-miR-222-3p  | 24.93669128  | 24.92152977  | 1.01        |
| A11  | mmu-miR-92a-3p  | 26.90890312  | 25.92240715  | 1.99        |
| A12  | mmu-miR-184-3p  | Undetermined | Undetermined | 1           |
| B01  | mmu-miR-15a-5p  | 28.93863487  | 28.94211388  | 1           |
| B02  | mmu-miR-106a-5p | 26.93645096  | 26.92916298  | 1.01        |
| B03  | mmu-miR-378a-3p | 28.92695808  | 28.92671776  | 1           |
| B04  | mmu-let-7b-5p   | 25.93050003  | 25.93578529  | -1          |
| B05  | mmu-miR-205-5p  | 36.97610092  | 36.90951538  | 1           |
| B06  | mmu-miR-137-3p  | 36.04257584  | 37.05566406  | 1           |
| B07  | mmu-miR-130a-3p | 25.92522621  | 26.92311096  | -1.99       |
| B08  | mmu-miR-199a-5p | 37.06684875  | 35.92062759  | 1           |
| B09  | mmu-miR-140-5p  | 29.91273499  | 28.91936302  | 2           |
| B10  | mmu-miR-20a-5p  | 25.9346714   | 24.91477585  | 2.03        |
| B11  | mmu-miR-146b-5p | 29.90658569  | 30.9265995   | -2.02       |
| B12  | mmu-miR-132-3p  | 32.90467834  | 31.90969276  | 2           |
| C01  | mmu-miR-193b-3p | 34.93021011  | 34.93456268  | -1          |
| C02  | mmu-miR-183-5p  | 31.92201614  | 31.9174118   | 1.01        |
| C03  | mmu-miR-34c-5p  | 29.9124279   | 29.92506218  | -1.01       |
| C04  | mmu-miR-30c-5p  | 21.93475914  | 22.93477249  | -1.99       |
| C05  | mmu-miR-148a-3p | 29.92855835  | 29.93034935  | 1           |
| C06  | mmu-miR-134-5p  | 37.08755493  | 35.93980408  | 1           |
| C07  | mmu-let-7g-5p   | 24.92316628  | 24.918396    | 1.01        |
| C08  | mmu-miR-138-5p  | 26.91534805  | 27.90878296  | -1.99       |
| C09  | mmu-miR-141-3p  | Undetermined | 36.92817688  | 1           |
| C10  | mmu-let-7c-5p   | 23.90778542  | 24.91333389  | -2          |
| C11  | mmu-let-7e-5p   | 24.9557209   | 24.92352295  | 1.03        |
| C12  | mmu-miR-218-5p  | 28.92085838  | 28.92638016  | -1          |
| D01  | mmu-miR-29b-3p  | 27.91798401  | 26.9121151   | 2.01        |
| D02  | mmu-miR-146a-5p | 30.9341011   | 30.92422676  | 1.01        |
| D03  | mmu-miR-135b-5p | 30.93478203  | 32.91255951  | -3.93       |

|     |                 |             |             |       |
|-----|-----------------|-------------|-------------|-------|
| D04 | mmu-miR-31-5p   | 23.91101074 | 22.91385651 | 2     |
| D05 | mmu-miR-124-3p  | 33.92910767 | 32.92904663 | 2.01  |
| D06 | mmu-miR-21a-5p  | 20.92340279 | 19.9220047  | 2.01  |
| D07 | mmu-miR-181d-5p | 27.91039467 | 28.9313755  | -2.02 |
| D08 | mmu-miR-301a-3p | 25.92218208 | 25.9250412  | 1     |
| D09 | mmu-miR-195a-5p | 22.92193222 | 22.92303848 | 1     |
| D10 | mmu-miR-100-5p  | 28.93616867 | 28.92419815 | 1.01  |
| D11 | mmu-miR-10b-5p  | 23.90637589 | 24.91918564 | -2.01 |
| D12 | mmu-miR-155-5p  | 25.92173386 | 25.92570114 | -1    |
| E01 | mmu-miR-1a-3p   | 34.94862747 | 35.94289398 | -1.03 |
| E02 | mmu-miR-150-5p  | 26.93079376 | 27.92480659 | -1.99 |
| E03 | mmu-let-7i-5p   | 24.92438316 | 24.92171097 | 1     |
| E04 | mmu-miR-27b-3p  | 23.91738701 | 23.92375183 | -1    |
| E05 | mmu-miR-7a-5p   | 27.92990112 | 27.90505981 | 1.02  |
| E06 | mmu-miR-221-3p  | 24.93365288 | 24.92340469 | 1.01  |
| E07 | mmu-miR-29a-3p  | 22.94110298 | 21.91106033 | 2.05  |
| E08 | mmu-miR-191-5p  | 25.92211723 | 25.92600441 | -1    |
| E09 | mmu-let-7d-5p   | 24.91808319 | 24.9145813  | 1.01  |
| E10 | mmu-miR-9-5p    | 24.93434906 | 25.95051193 | -2.02 |
| E11 | mmu-let-7f-5p   | 23.91887665 | 23.92042351 | 1     |
| E12 | mmu-miR-10a-5p  | 24.92476273 | 25.92919731 | -2    |
| F01 | mmu-miR-181b-5p | 28.93732643 | 28.92929459 | 1.01  |
| F02 | mmu-miR-15b-5p  | 23.91397476 | 24.92730331 | -2.01 |
| F03 | mmu-miR-16-5p   | 22.93417931 | 22.93452454 | 1     |
| F04 | mmu-miR-210-3p  | 31.94335365 | 29.94071007 | 4.02  |
| F05 | mmu-miR-17-5p   | 25.93621063 | 25.94267082 | -1    |
| F06 | mmu-miR-98-5p   | 26.9298439  | 26.92365074 | 1.01  |
| F07 | mmu-miR-34a-5p  | 26.92129326 | 26.91951942 | 1     |
| F08 | mmu-miR-25-3p   | 24.93368912 | 24.92198181 | 1.01  |
| F09 | mmu-miR-144-3p  | 36.92528152 | 34.96735001 | 1.03  |
| F10 | mmu-miR-128-3p  | 28.91131973 | 29.92587471 | -2.02 |
| F11 | mmu-miR-223-3p  | 33.91579437 | 34.92480087 | -2.01 |
| F12 | mmu-miR-215-5p  | 36.9511261  | 37.01885605 | 1     |
| G01 | mmu-miR-19a-3p  | 25.95835876 | 24.9184227  | 2.06  |
| G02 | mmu-miR-193a-5p | 30.96591568 | 30.93407631 | 1.02  |
| G03 | mmu-miR-18a-5p  | 27.94054222 | 27.91716766 | 1.02  |
| G04 | mmu-miR-214-3p  | 36.91039658 | 36.94837189 | 1     |
| G05 | mmu-miR-126a-3p | 18.94328499 | 18.93671036 | 1.01  |
| G06 | mmu-miR-27a-3p  | 22.93947601 | 22.96047592 | -1.01 |
| G07 | mmu-miR-103-3p  | 25.92319298 | 25.92969513 | -1    |
| G08 | mmu-miR-149-5p  | 36.90130997 | 35.91169357 | 1     |

|            |                 |                    |                    |              |
|------------|-----------------|--------------------|--------------------|--------------|
| G09        | mmu-miR-23b-3p  | 24.92694664        | 24.91783524        | 1.01         |
| G10        | mmu-miR-203-3p  | 34.91667557        | 33.920578          | 2            |
| G11        | mmu-miR-32-5p   | 34.92429352        | 32.91352463        | 4.04         |
| G12        | mmu-miR-181c-5p | 28.899086          | 28.92258263        | -1.01        |
| H01        | cel-miR-39-3p   | 36.92234421        | Undetermined       | 1            |
| H02        | cel-miR-39-3p   | Undetermined       | Undetermined       | 1            |
| <b>H03</b> | <b>SNORD61</b>  | <b>25.94545174</b> | <b>25.96386147</b> | <b>-1.01</b> |
| H04        | SNORD68         | 21.97171593        | 20.94314384        | 2.05         |
| H05        | SNORD72         | 24.94703865        | 23.91949463        | 2.04         |
| H06        | SNORD95         | 23.93820572        | 22.93654633        | 2.01         |
| <b>H07</b> | <b>SNORD96A</b> | <b>21.93294525</b> | <b>21.92205238</b> | <b>1.01</b>  |
| H08        | RNU6-6P         | 21.9321785         | 23.91828346        | -3.95        |
| H09        | miRTC           | 25.93450928        | 25.94080734        | -1           |
| H10        | miRTC           | 25.92940521        | 25.93654251        | -1           |
| H11        | PPC             | 20.90458488        | 20.90866852        | -1           |
| H12        | PPC             | 20.89523315        | 20.90574265        | -1           |

## RUN 1

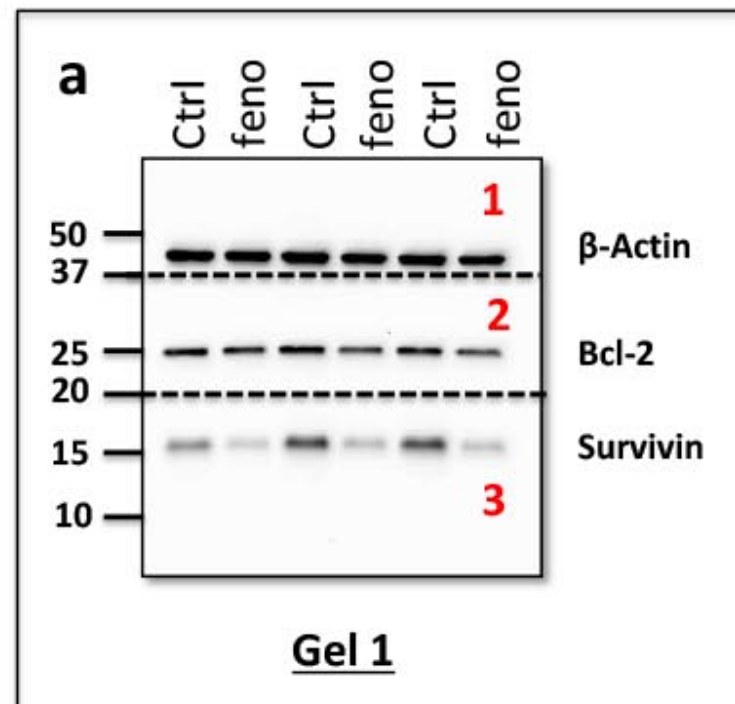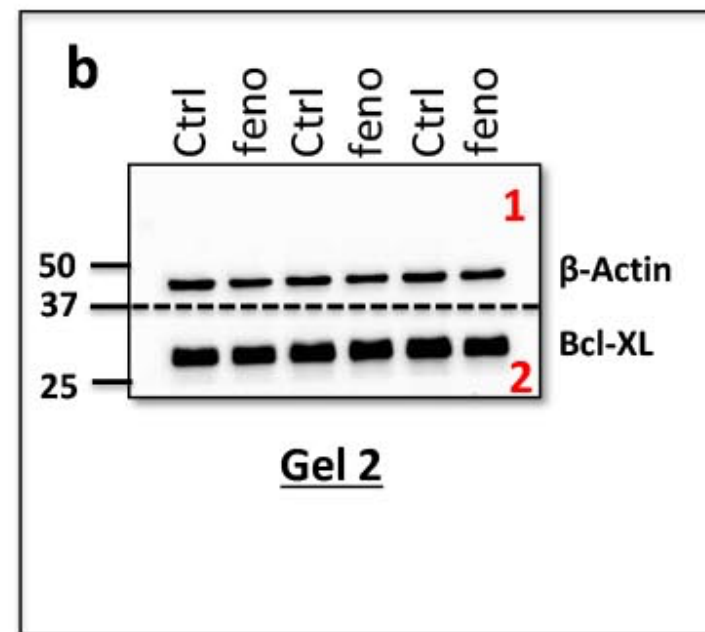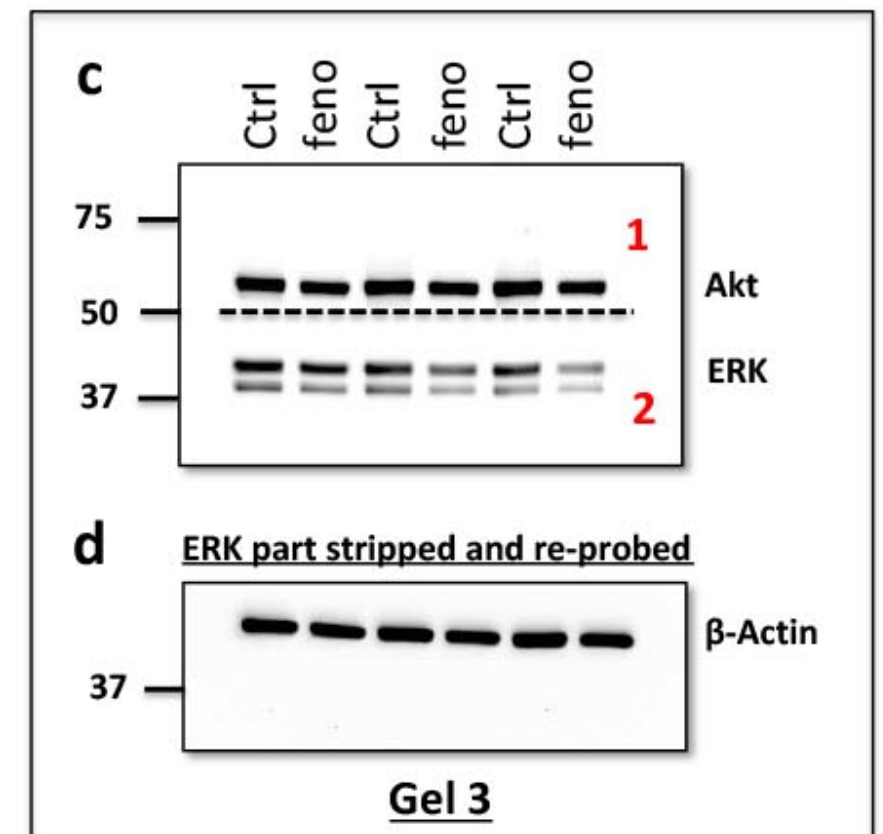

In Run 1 (Gels 1, 2 and 3), Control and fenofibrate-treated cell lysates from 3 independent experiments were prepared and analyzed by western blotting. Following transfer, membrane for Gel 1 was divided into 3 parts and probed for  $\beta$ -actin, Bcl-2 and survivin (as indicated) (a). Membrane for Gel 2 was divided into 2 parts and probed for  $\beta$ -actin and Bcl-XL (b). Membrane for Gel 3 was divided into 2 parts and probed for Akt and ERK (c). The 'ERK part' of the membrane was then stripped and re-probed for  $\beta$ -actin (d).

## RUN 2

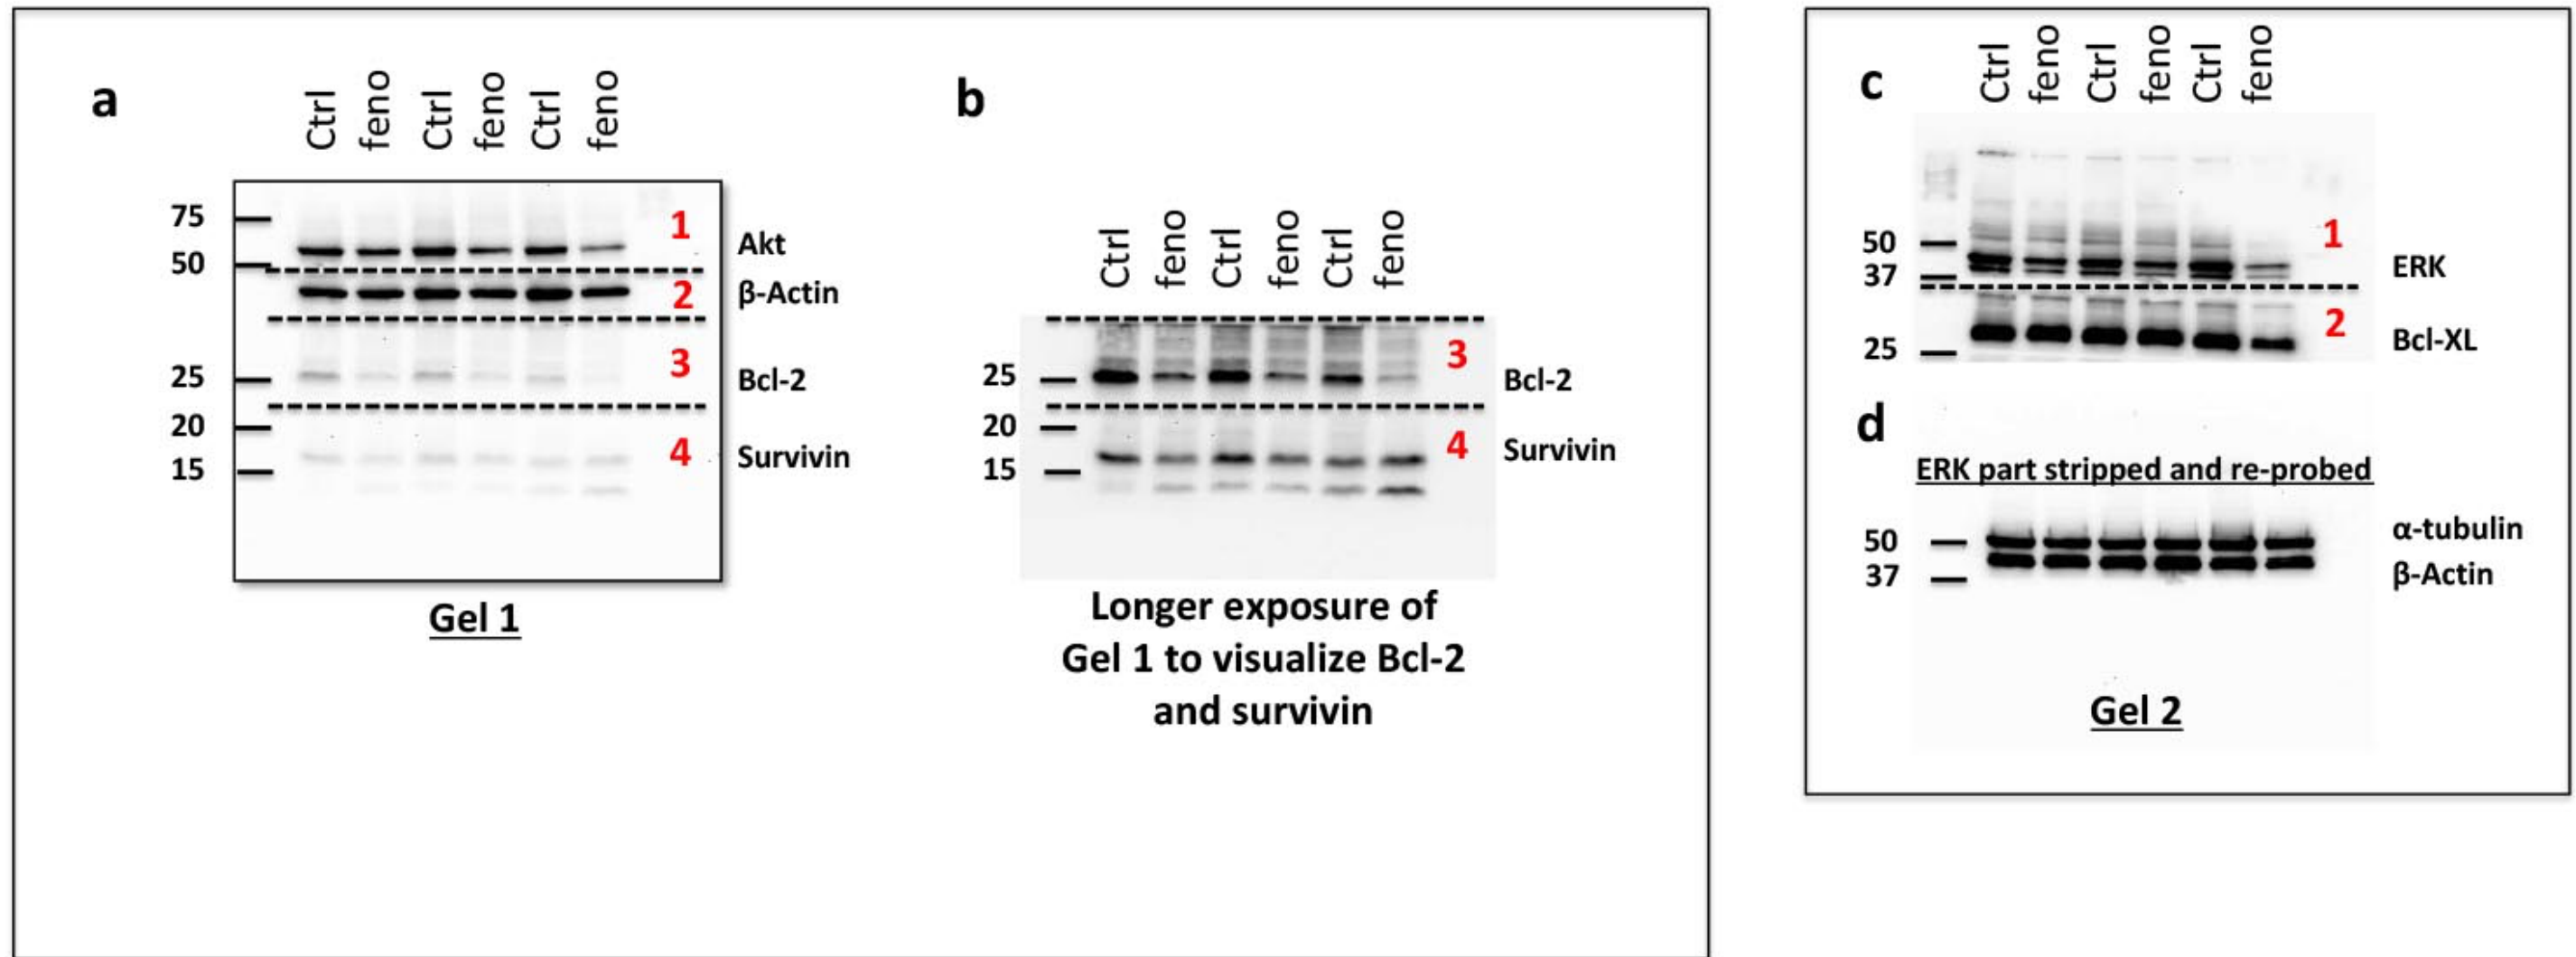

In Run 2 (Gels 1 and 2), Control and fenofibrate-treated cell lysates from 3 independent experiments were prepared and analyzed by western blotting. Following transfer, membrane for Gel 1 was divided into 4 parts and probed for Akt,  $\beta$ -actin, Bcl-2 and survivin (as indicated). Akt and  $\beta$ -actin were readily visualized (a) and a longer exposure was needed to visualize Bcl-2 and survivin (b). Membrane for Gel 2 was divided into 2 parts and probed for ERK and Bcl-XL, which were readily detected (c). The 'ERK part' of the membrane was then stripped and re-probed for  $\alpha$ -tubulin and  $\beta$ -actin (d) (antibodies were raised in different species so simultaneous probing was possible).
